# Supplementary material for: Mental Health of Young Australians during the COVID-19 Pandemic: Exploring the Roles of Employment Precarity, Screen Time, and Contact with Nature
Source: Int J Environ Res Public Health. 2021 May 25;18(11):5630. doi: 10.3390/ijerph18115630 (PMC8197562; doi:10.3390/ijerph18115630)
Supplement: Supplementary file 1 [file ijerph-18-05630-s001.zip › Table S1.pdf]

**Table S1 –****Descriptive statistics of all study variables**

| Study Variables                             | Total<br>n = 1,004<br>(100%) | Flourishing<br>n = 142<br>(14%) | Languishing<br>n = 257<br>(26%) | Struggling<br>n = 477<br>(48%) | Floundering,<br>N = 128<br>(13%) | p-value |
|---------------------------------------------|------------------------------|---------------------------------|---------------------------------|--------------------------------|----------------------------------|---------|
| <b>Employment &amp; Financial Variables</b> |                              |                                 |                                 |                                |                                  |         |
| Employment Precarity                        |                              |                                 |                                 |                                |                                  | <.001   |
| Permanent                                   | 288 (29%)                    | 57 (40%)                        | 69 (27%)                        | 139 (29%)                      | 23 (18%)                         |         |
| Fixed-Term                                  | 89 (9%)                      | 6 (4%)                          | 24 (9%)                         | 52 (11%)                       | 7 (6%)                           |         |
| Regular Casual Hours                        | 200 (20%)                    | 28 (20%)                        | 47 (19%)                        | 106 (22%)                      | 19 (15%)                         |         |
| Irregular Hours                             | 98 (10%)                     | 12 (9%)                         | 21 (8%)                         | 45 (9%)                        | 20 (16%)                         |         |
| JobKeeper                                   | 54 (5%)                      | 3 (2%)                          | 10 (4%)                         | 31 (7%)                        | 10 (8%)                          |         |
| Not Employed                                | 266 (27%)                    | 35 (25%)                        | 83 (33%)                        | 102 (21%)                      | 46 (37%)                         |         |
| Working from home was stressful             |                              |                                 |                                 |                                |                                  | .001    |
| Disagree                                    | 77 (24%)                     | 18 (39%)                        | 25 (36%)                        | 31 (17%)                       | 3 (13%)                          |         |
| Neutral                                     | 60 (19%)                     | 10 (22%)                        | 16 (23%)                        | 29 (16%)                       | 5 (22%)                          |         |
| Agree                                       | 181 (57%)                    | 18 (39%)                        | 29 (41%)                        | 119 (67%)                      | 15 (65%)                         |         |
| Hours change                                |                              |                                 |                                 |                                |                                  | <.001   |
| Decreased                                   | 373 (50%)                    | 45 (41%)                        | 70 (40%)                        | 211 (56%)                      | 47 (59%)                         |         |
| Stayed the same                             | 238 (32%)                    | 50 (46%)                        | 82 (47%)                        | 89 (24%)                       | 17 (21%)                         |         |
| Increased                                   | 131 (18%)                    | 14 (13%)                        | 23 (13%)                        | 78 (21%)                       | 16 (20%)                         |         |
| Income change                               |                              |                                 |                                 |                                |                                  | <.001   |
| Decreased                                   | 317 (43%)                    | 35 (32%)                        | 62 (35%)                        | 177 (47%)                      | 43 (53%)                         |         |
| Stayed the same                             | 260 (35%)                    | 53 (48%)                        | 76 (43%)                        | 105 (28%)                      | 26 (32%)                         |         |
| Increased                                   | 168 (23%)                    | 22 (20%)                        | 37 (21%)                        | 97 (26%)                       | 12 (15%)                         |         |
| Financial stress                            |                              |                                 |                                 |                                |                                  | <.001   |
| No – low                                    | 218 (22%)                    | 60 (42%)                        | 80 (31%)                        | 69 (14%)                       | 9 (7%)                           |         |
| Moderate                                    | 308 (31%)                    | 48 (34%)                        | 103 (40%)                       | 118 (25%)                      | 39 (30%)                         |         |
| High – overwhelming                         | 478 (48%)                    | 34 (24%)                        | 74 (29%)                        | 290 (61%)                      | 80 (63%)                         |         |
| <b>Screen Time Variables</b>                |                              |                                 |                                 |                                |                                  |         |
| Overall screen time                         |                              |                                 |                                 |                                |                                  | <.001   |
| Decreased                                   | 91 (9%)                      | 2 (1%)                          | 12 (5%)                         | 72 (15%)                       | 5 (4%)                           |         |
| Stayed the same                             | 144 (14%)                    | 32 (23%)                        | 42 (16%)                        | 46 (10%)                       | 24 (19%)                         |         |
| Increased                                   | 769 (77%)                    | 108 (76%)                       | 203 (79%)                       | 359 (75%)                      | 99 (77%)                         |         |
| Social Media Use                            |                              |                                 |                                 |                                |                                  | <.001   |
| Decreased                                   | 105 (11%)                    | 5 (4%)                          | 9 (4%)                          | 78 (17%)                       | 13 (10%)                         |         |
| Stayed the same                             | 323 (33%)                    | 44 (32%)                        | 92 (36%)                        | 146 (31%)                      | 41 (33%)                         |         |
| Increased                                   | 554 (56%)                    | 88 (64%)                        | 153 (60%)                       | 242 (52%)                      | 71 (57%)                         |         |
| Videochatting                               |                              |                                 |                                 |                                |                                  | <.001   |
| Decreased                                   | 114 (13%)                    | 5 (4%)                          | 10 (4%)                         | 86 (19%)                       | 13 (13%)                         |         |
| Stayed the same                             | 302 (34%)                    | 36 (28%)                        | 82 (36%)                        | 150 (34%)                      | 34 (33%)                         |         |
| Increased                                   | 486 (54%)                    | 87 (68%)                        | 138 (60%)                       | 206 (47%)                      | 55 (54%)                         |         |
| Streaming services                          |                              |                                 |                                 |                                |                                  | <.001   |
| Decreased                                   | 109 (12%)                    | 6 (4%)                          | 13 (5%)                         | 82 (18%)                       | 8 (7%)                           |         |
| Stayed the same                             | 320 (34%)                    | 42 (31%)                        | 87 (36%)                        | 155 (34%)                      | 36 (31%)                         |         |
| Increased                                   | 512 (54%)                    | 87 (64%)                        | 140 (58%)                       | 214 (47%)                      | 71 (62%)                         |         |
| Videogaming                                 |                              |                                 |                                 |                                |                                  | <.001   |
| Decreased                                   | 148 (19%)                    | 10 (9%)                         | 25 (13%)                        | 102 (26%)                      | 11 (12%)                         |         |
| Stayed the same                             | 303 (38%)                    | 45 (41%)                        | 78 (40%)                        | 147 (37%)                      | 33 (36%)                         |         |

|                                                 |           |           |           |           |           |       |
|-------------------------------------------------|-----------|-----------|-----------|-----------|-----------|-------|
| Increased                                       | 346 (43%) | 56 (50%)  | 93 (47%)  | 150 (38%) | 47 (52%)  |       |
| Phone Use                                       |           |           |           |           |           | <.001 |
| Decreased                                       | 110 (11%) | 1 (<1%)   | 11 (4%)   | 92 (20%)  | 6 (5%)    |       |
| Stayed the same                                 | 294 (30%) | 42 (30%)  | 85 (33%)  | 128 (28%) | 39 (31%)  |       |
| Increased                                       | 570 (59%) | 96 (69%)  | 158 (62%) | 235 (52%) | 81 (64%)  |       |
| Laptop / Computer Use                           |           |           |           |           |           | <.001 |
| Decreased                                       | 106 (11%) | 1 (<1%)   | 11 (4%)   | 85 (19%)  | 9 (7%)    |       |
| Stayed the same                                 | 303 (32%) | 43 (31%)  | 89 (36%)  | 133 (30%) | 38 (32%)  |       |
| Increased                                       | 545 (57%) | 94 (68%)  | 148 (60%) | 230 (51%) | 73 (61%)  |       |
| ST helped stay connected to family & friends    |           |           |           |           |           | <.001 |
| Disagree                                        | 119 (12%) | 12 (9%)   | 23 (9%)   | 66 (14%)  | 18 (14%)  |       |
| Neutral                                         | 143 (15%) | 7 (5%)    | 26 (10%)  | 87 (19%)  | 23 (18%)  |       |
| Agree                                           | 722 (73%) | 119 (86%) | 205 (81%) | 312 (67%) | 86 (68%)  |       |
| I found myself disengaging from technology      |           |           |           |           |           | <.001 |
| Disagree                                        | 237 (24%) | 47 (35%)  | 83 (33%)  | 91 (20%)  | 16 (13%)  |       |
| Neutral                                         | 327 (34%) | 47 (35%)  | 89 (35%)  | 146 (32%) | 45 (36%)  |       |
| Agree                                           | 412 (42%) | 42 (31%)  | 83 (33%)  | 223 (48%) | 64 (51%)  |       |
| ST was fatiguing                                |           |           |           |           |           | <.001 |
| Disagree                                        | 177 (18%) | 43 (31%)  | 49 (19%)  | 66 (14%)  | 19 (15%)  |       |
| Neutral                                         | 255 (26%) | 33 (24%)  | 72 (28%)  | 114 (24%) | 36 (28%)  |       |
| Agree                                           | 558 (56%) | 61 (45%)  | 135 (53%) | 289 (62%) | 73 (57%)  |       |
| Technology helped me cope                       |           |           |           |           |           | 0.06  |
| Disagree                                        | 142 (14%) | 14 (10%)  | 38 (15%)  | 64 (14%)  | 26 (20%)  |       |
| Neutral                                         | 290 (29%) | 37 (27%)  | 87 (34%)  | 128 (28%) | 38 (30%)  |       |
| Agree                                           | 553 (56%) | 88 (63%)  | 129 (51%) | 272 (59%) | 64 (50%)  |       |
| Felt the need to restrict news viewing          |           |           |           |           |           | <.001 |
| Disagree                                        | 221 (23%) | 47 (34%)  | 70 (27%)  | 80 (17%)  | 24 (19%)  |       |
| Neutral                                         | 285 (29%) | 37 (27%)  | 71 (28%)  | 133 (29%) | 44 (35%)  |       |
| Agree                                           | 476 (48%) | 54 (39%)  | 114 (45%) | 249 (54%) | 59 (46%)  |       |
| <b>Nature Access Variables</b>                  |           |           |           |           |           |       |
| Perceived neighbourhood naturalness             |           |           |           |           |           | <.001 |
| Highly built                                    | 54 (5%)   | 5 (4%)    | 14 (5%)   | 21 (4%)   | 14 (11%)  |       |
| Moderately built                                | 140 (14%) | 19 (13%)  | 44 (17%)  | 56 (12%)  | 21 (16%)  |       |
| Even mix of built and natural                   | 331 (33%) | 54 (38%)  | 91 (35%)  | 139 (29%) | 47 (37%)  |       |
| Moderately natural                              | 391 (39%) | 48 (34%)  | 99 (39%)  | 202 (42%) | 42 (33%)  |       |
| Highly natural                                  | 88 (9%)   | 16 (11%)  | 9 (4%)    | 59 (12%)  | 4 (3%)    |       |
| Greenspace and/or bluespace in walking distance |           |           |           |           |           | 0.11  |
| No                                              | 226 (23%) | 21 (15%)  | 64 (25%)  | 109 (23%) | 32 (25%)  |       |
| Yes                                             | 777 (77%) | 120 (85%) | 193 (75%) | 368 (77%) | 96 (75%)  |       |
| Access to residential outdoor space             |           |           |           |           |           | .004  |
| No                                              | 51 (5%)   | 3 (2%)    | 6 (2%)    | 30 (6%)   | 12 (10%)  |       |
| Yes                                             | 951 (95%) | 139 (98%) | 251 (98%) | 447 (94%) | 114 (90%) |       |

| Nature Experience Variables             |                        |                        |                        |                        |                         |       |
|-----------------------------------------|------------------------|------------------------|------------------------|------------------------|-------------------------|-------|
| Overall contact with nature             |                        |                        |                        |                        |                         | .01   |
| Decreased                               | 288 (31%)              | 29 (21%)               | 75 (31%)               | 136 (30%)              | 48 (41%)                |       |
| Stayed the same                         | 407 (43%)              | 62 (45%)               | 98 (40%)               | 196 (44%)              | 51 (43%)                |       |
| Increased                               | 249 (26%)              | 46 (34%)               | 70 (29%)               | 114 (26%)              | 19 (16%)                |       |
| Went out in neighbourhood               |                        |                        |                        |                        |                         | .001  |
| Decreased                               | 272 (29%)              | 33 (24%)               | 57 (24%)               | 134 (30%)              | 48 (44%)                |       |
| Stayed the same                         | 366 (39%)              | 50 (37%)               | 94 (39%)               | 183 (41%)              | 39 (35%)                |       |
| Increased                               | 298 (32%)              | 52 (39%)               | 91 (38%)               | 132 (29%)              | 23 (21%)                |       |
| Spent time in local park                |                        |                        |                        |                        |                         | .03   |
| Decreased                               | 284 (32%)              | 37 (28%)               | 60 (27%)               | 148 (34%)              | 39 (39%)                |       |
| Stayed the same                         | 371 (42%)              | 49 (37%)               | 99 (44%)               | 179 (41%)              | 44 (44%)                |       |
| Increased                               | 235 (26%)              | 46 (35%)               | 66 (29%)               | 106 (24%)              | 17 (17%)                |       |
| Planned activities in nature            |                        |                        |                        |                        |                         | .007  |
| Decreased                               | 305 (34%)              | 36 (28%)               | 72 (32%)               | 149 (34%)              | 48 (46%)                |       |
| Stayed the same                         | 375 (42%)              | 49 (38%)               | 103 (45%)              | 182 (42%)              | 41 (39%)                |       |
| Increased                               | 217 (24%)              | 45 (35%)               | 52 (23%)               | 105 (24%)              | 15 (14%)                |       |
| Time in nature felt like “getting away” |                        |                        |                        |                        |                         | .002  |
| Disagree                                | 109 (11%)              | 5 (4%)                 | 25 (10%)               | 62 (14%)               | 17 (15%)                |       |
| Neutral                                 | 232 (24%)              | 23 (17%)               | 62 (25%)               | 114 (25%)              | 33 (28%)                |       |
| Agree                                   | 613 (64%)              | 108 (79%)              | 161 (65%)              | 278 (61%)              | 66 (57%)                |       |
| Time in nature felt uncomfortable       |                        |                        |                        |                        |                         | <.001 |
| Disagree                                | 516 (54%)              | 103 (75%)              | 161 (66%)              | 189 (42%)              | 63 (55%)                |       |
| Neutral                                 | 207 (22%)              | 19 (14%)               | 51 (21%)               | 107 (24%)              | 30 (26%)                |       |
| Agree                                   | 226 (24%)              | 15 (11%)               | 33 (13%)               | 157 (35%)              | 21 (18%)                |       |
| Other Psychological Constructs          |                        |                        |                        |                        |                         |       |
| Level of Hope (AHS)                     |                        |                        |                        |                        |                         | <.001 |
|                                         | M = 42.50<br>(SD 9.40) | M = 49.83<br>(SD 7.42) | M = 43.64<br>(SD 7.97) | M = 41.99<br>(SD 8.24) | M = 33.82<br>(SD 10.66) |       |
| Disruption to Core Beliefs (CBI)        |                        |                        |                        |                        |                         | <.001 |
|                                         | M = 2.83<br>(SD 0.95)  | M = 2.80<br>(SD 1.08)  | M = 2.58<br>(SD 0.96)  | M = 2.94<br>(SD 0.83)  | M = 2.92<br>(SD 1.11)   |       |

M = mean; SD = standard deviation; VET = vocational and educational training; PD = professional development; AHS = Adult Hope Scale; CBI = Core Beliefs Inventory.
