# Supplementary material for: Mental Health of Young Australians during the COVID-19 Pandemic: Exploring the Roles of Employment Precarity, Screen Time, and Contact with Nature
Source: Int J Environ Res Public Health. 2021 May 25;18(11):5630. doi: 10.3390/ijerph18115630 (PMC8197562; doi:10.3390/ijerph18115630)
Supplement: Supplementary file 1 [file ijerph-18-05630-s001.zip › Table S2.pdf]

**Table S2 –****Associations Between Different Types of Screen Activity and Mental Health State during the COVID-19 pandemic**

| <b>Variables</b>             | <b>Languishing vs. Flourishing<br/>RRR<sup>a</sup> (95% CI)</b> | <b>Struggling vs. Flourishing<br/>RRR<sup>a</sup> (95% CI)</b> | <b>Floundering vs. Flourishing<br/>RRR<sup>a</sup> (95% CI)</b> |
|------------------------------|-----------------------------------------------------------------|----------------------------------------------------------------|-----------------------------------------------------------------|
| <b>Social Media Use</b>      |                                                                 |                                                                |                                                                 |
| Stayed the same              | 1.00 (Reference)                                                | 1.00 (Reference)                                               | 1.00 (Reference)                                                |
| Decreased                    | 0.86 (0.27 – 2.71)                                              | <b>4.95 (1.88 – 13.02)</b>                                     | 2.89 (0.94 – 8.83)                                              |
| Increased                    | 0.82 (0.53 – 1.29)                                              | 0.84 (0.55 – 1.28)                                             | 0.85 (0.50 – 1.45)                                              |
| <b>Video-chatting</b>        |                                                                 |                                                                |                                                                 |
| Stayed the same              | 1.00 (Reference)                                                | 1.00 (Reference)                                               | 1.00 (Reference)                                                |
| Decreased                    | 0.88 (0.28 – 2.77)                                              | <b>4.04 (1.53 – 10.72)</b>                                     | 2.65 (0.85 – 8.25)                                              |
| Increased                    | 0.67 (0.42 – 1.08)                                              | <b>0.56 (0.36 – 0.88)</b>                                      | 0.63 (0.35 – 1.14)                                              |
| <b>Streaming services</b>    |                                                                 |                                                                |                                                                 |
| Stayed the same              | 1.00 (Reference)                                                | 1.00 (Reference)                                               | 1.00 (Reference)                                                |
| Decreased                    | 1.05 (0.37 – 2.95)                                              | <b>3.65 (1.49 – 8.99)</b>                                      | 1.58 (0.50 – 5.01)                                              |
| Increased                    | 0.78 (0.50 – 1.24)                                              | 0.67 (0.44 – 1.03)                                             | 0.92 (0.53 – 1.59)                                              |
| <b>Video-gaming</b>          |                                                                 |                                                                |                                                                 |
| Stayed the same              | 1.00 (Reference)                                                | 1.00 (Reference)                                               | 1.00 (Reference)                                                |
| Decreased                    | 1.45 (0.64 – 3.31)                                              | <b>3.00 (1.44 – 6.25)</b>                                      | 1.48 (0.56 – 3.91)                                              |
| Increased                    | 0.92 (0.56 – 1.52)                                              | 0.76 (0.48 – 1.20)                                             | 1.13 (0.62 – 2.06)                                              |
| <b>Phone Use</b>             |                                                                 |                                                                |                                                                 |
| Stayed the same              | 1.00 (Reference)                                                | 1.00 (Reference)                                               | 1.00 (Reference)                                                |
| Decreased                    | 5.46 (0.68 – 43.70)                                             | <b>30.71 (4.15 – 227.43)</b>                                   | 6.51 (0.75 – 56.54)                                             |
| Increased                    | 0.81 (0.52 – 1.27)                                              | 0.79 (0.52 – 1.21)                                             | 0.88 (0.52 – 1.49)                                              |
| <b>Laptop / Computer Use</b> |                                                                 |                                                                |                                                                 |
| Stayed the same              | 1.00 (Reference)                                                | 1.00 (Reference)                                               | 1.00 (Reference)                                                |
| Decreased                    | 5.37 (0.67 – 43.00)                                             | <b>27.63 (3.73 – 204.67)</b>                                   | <b>10.17 (1.23 – 84.12)</b>                                     |
| Increased                    | 0.74 (0.47 – 1.16)                                              | 0.75 (0.49 – 1.15)                                             | 0.87 (0.51 – 1.48)                                              |

ST = screen time; RRR<sup>a</sup> = Relative Risk Ratio adjusted for gender, studying (yes/no) and SES; statistically significant associations bolded.
