# Supplementary material for: Mental Health of Young Australians during the COVID-19 Pandemic: Exploring the Roles of Employment Precarity, Screen Time, and Contact with Nature
Source: Int J Environ Res Public Health. 2021 May 25;18(11):5630. doi: 10.3390/ijerph18115630 (PMC8197562; doi:10.3390/ijerph18115630)
Supplement: Supplementary file 1 [file ijerph-18-05630-s001.zip › Table S3.pdf]

**Table S3 –**

**Associations Between Different Types of Nature Activities and Mental Health State during the COVID-19 pandemic**

| Variables                           | Languishing vs. Flourishing<br>RRR <sup>a</sup> (95% CI) | Struggling vs. Flourishing<br>RRR <sup>a</sup> (95% CI) | Floundering vs. Flourishing<br>RRR <sup>a</sup> (95% CI) |
|-------------------------------------|----------------------------------------------------------|---------------------------------------------------------|----------------------------------------------------------|
| <b>Out in neighbourhood</b>         |                                                          |                                                         |                                                          |
| Stayed the same                     | 1.00 (Reference)                                         | 1.00 (Reference)                                        | 1.00 (Reference)                                         |
| Decreased                           | 0.93 (0.53 – 1.60)                                       | 1.11 (0.68 – 1.82)                                      | <b>1.85 (1.00 – 3.41)</b>                                |
| Increased                           | 0.93 (0.57 – 1.51)                                       | 0.70 (0.45 – 1.10)                                      | 0.56 (0.30 – 1.08)                                       |
| <b>Time in local park</b>           |                                                          |                                                         |                                                          |
| Stayed the same                     | 1.00 (Reference)                                         | 1.00 (Reference)                                        | 1.00 (Reference)                                         |
| Decreased                           | 0.82 (0.48 – 1.40)                                       | 1.08 (0.67 – 1.75)                                      | 0.17 (0.64 – 2.14)                                       |
| Increased                           | 0.73 (0.44 – 1.21)                                       | 0.64 (0.40 – 1.02)                                      | <b>0.41 (0.20 – 0.81)</b>                                |
| <b>Planned activities in nature</b> |                                                          |                                                         |                                                          |
| Stayed the same                     | 1.00 (Reference)                                         | 1.00 (Reference)                                        | 1.00 (Reference)                                         |
| Decreased                           | 0.95 (0.56 – 1.61)                                       | 1.11 (0.68 – 1.79)                                      | 1.59 (0.88 – 2.90)                                       |
| Increased                           | <b>0.54 (0.32 – 0.91)</b>                                | 0.64 (0.40 – 1.03)                                      | <b>0.40 (0.20 – 0.82)</b>                                |

RRR<sup>a</sup> = Relative Risk Ratio adjusted for gender and SES; statistically significant associations bolded.
